# Supplementary material for: Improving Photoelectrochemical Activity of Magnetron-Sputtered Double-Layer Tungsten Trioxide Photoanodes by Irradiation with Intense Pulsed Ion Beams
Source: MDPI journal article supplement (doi:10.3390/nano12152639), 2022-07-31
Supplement: s1 [file s1]

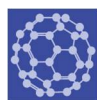

Supplementary materials

# Improving Photoelectrochemical Activity of Magnetron-Sputtered Double-Layer Tungsten Trioxide Photoanodes by Irradiation with Intense Pulsed Ion Beams

Alshyn Abduvalov <sup>1,\*</sup>, Marat Kaikanov <sup>1</sup>, Timur Sh. Atabaev <sup>2</sup> and Alexander Tikhonov <sup>1</sup>

<sup>1</sup> Physics Department, School of Sciences and Humanities, Nazarbayev University, Nur-Sultan 010000, Kazakhstan; marat.kaikanov@nu.edu.kz (M.K.); atikhonov@nu.edu.kz (A.T.)

<sup>2</sup> Chemistry Department, School of Sciences and Humanities, Nazarbayev University, Nur-Sultan 010000, Kazakhstan; timur.atabaev@nu.edu.kz

\* Correspondence: alshyn.abduvalov@nu.edu.kz; Tel.: +7-747-583-11-92

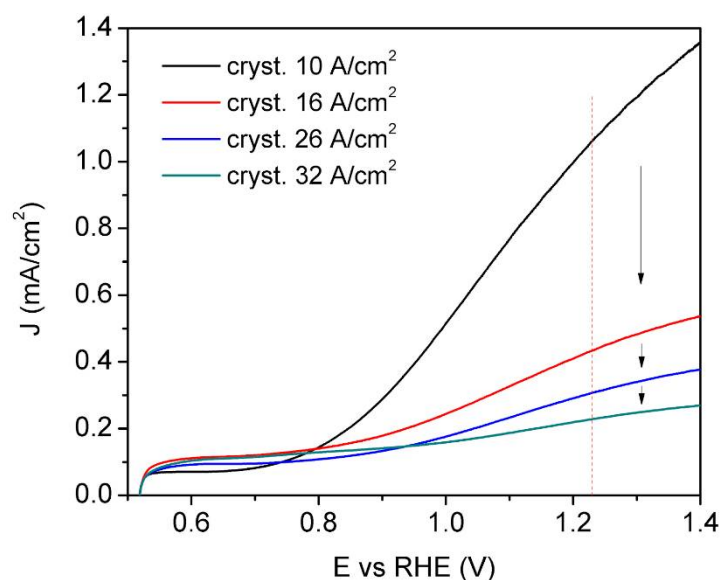

**Figure S1.** LSV curves of irradiated crystalline  $\text{WO}_3$  thin films with increasing ion beam current density. Black arrows indicate that photocurrent generation reduces with increasing ion beam current densities.

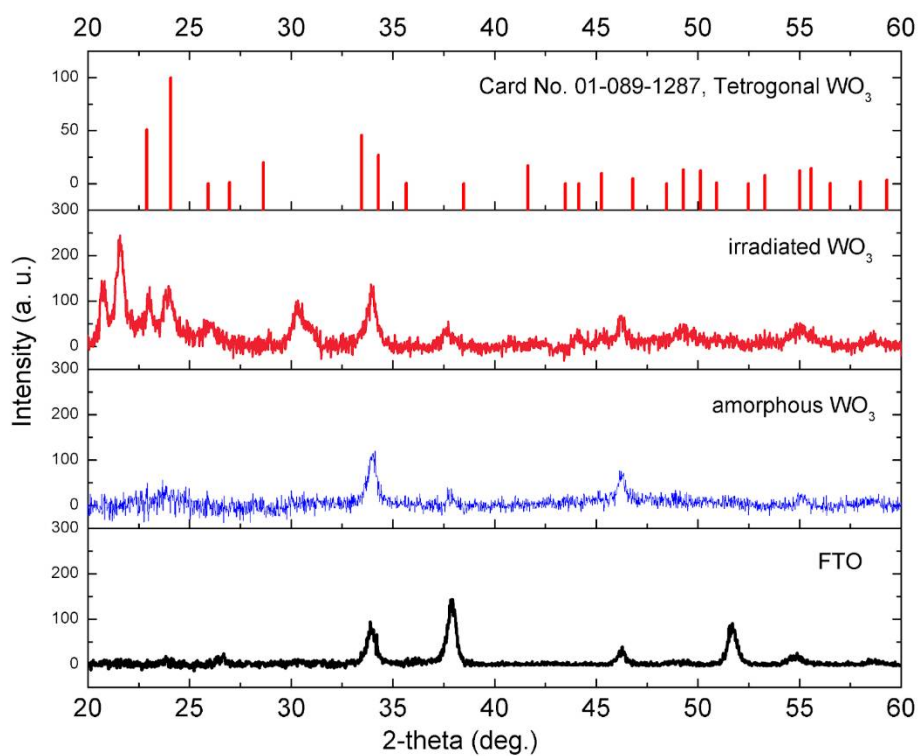

**Figure S2.** GI-XRD patterns of initially amorphous  $\text{WO}_3$  thin film before and after irradiation with 6  $\text{A}/\text{cm}^2$  ion beam current density.

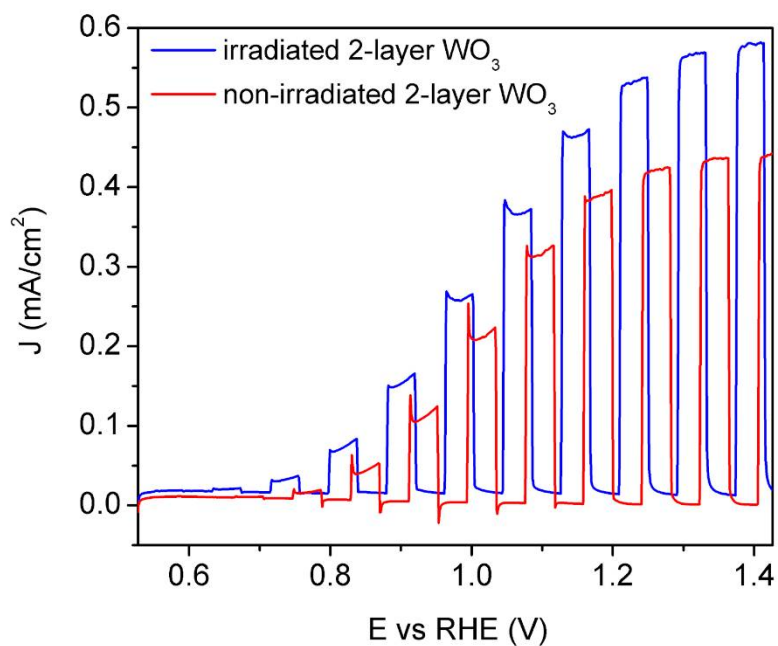

**Figure S3.** Chopped linear sweep voltammetry curves of double-layer  $\text{WO}_3$  before and after modification with IPIB of 6  $\text{A}/\text{cm}^2$  ion beam current density.

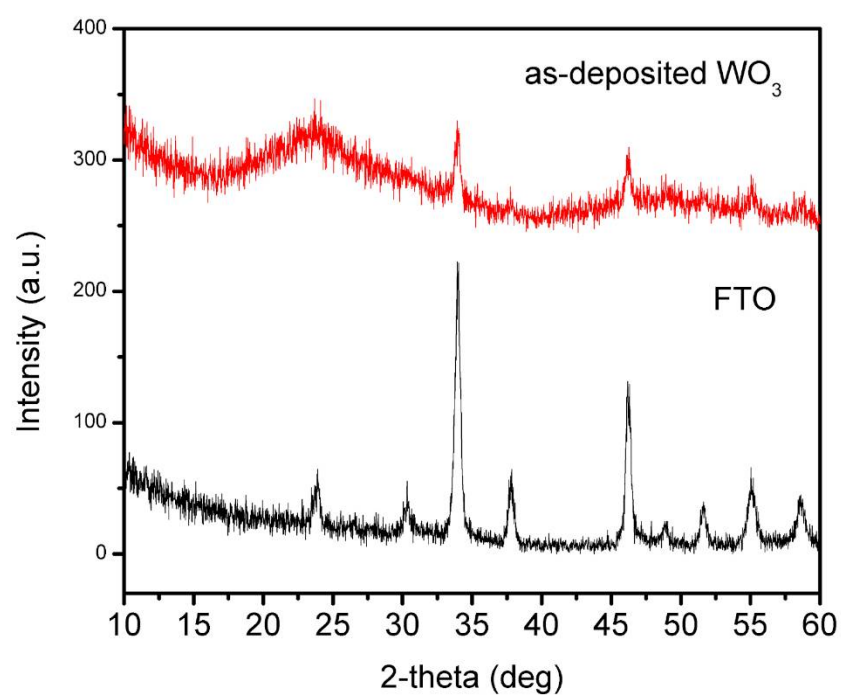

**Figure S4.** High resolution GI-XRD patterns of amorphous  $\text{WO}_3$  and FTO substrate
